# Supplementary material for: Synergistic IL-6 and IL-8 paracrine signalling pathway infers a strategy to inhibit tumour cell migration
Source: PubMed Central journal article supplement (PMC5458548; doi:10.1038/ncomms15584), 2017-05-26
Supplement: ncomms15584-s1.pdf [file ncomms15584-s1.pdf]

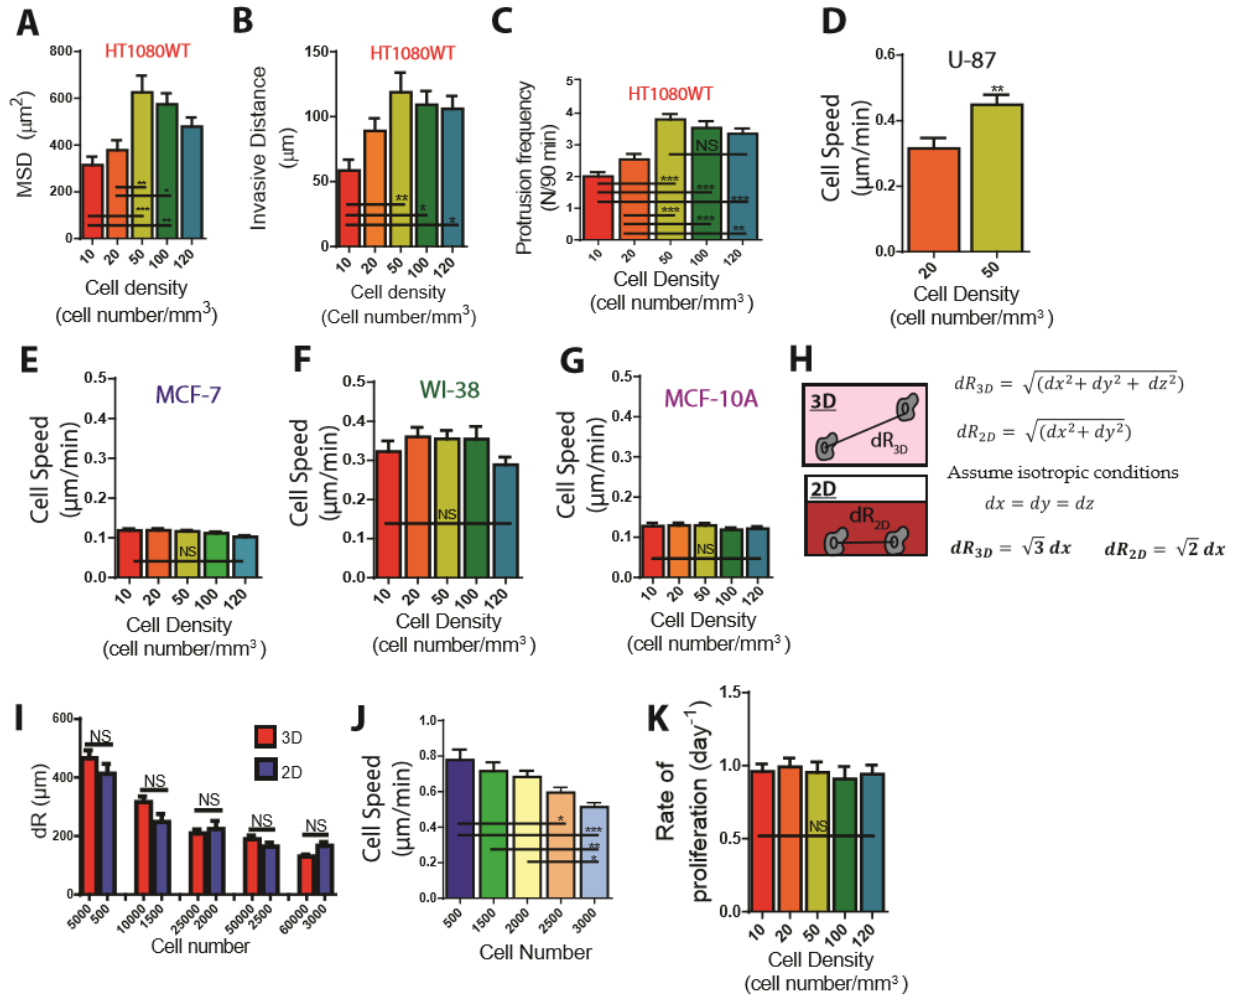

**Supplementary Figure 1: Influence of cell density on migration.** A,B. Migration parameters of fibrosarcoma cells measured at a time lag of 2 min at different seeding densities. C. Relationship between protrusion frequency and cell density: Protrusion frequency increases with cell density and plateaus at a threshold density of 50 cells/ $\text{mm}^3$ . E-G. Cell speed measured at a time lag of 2 min at different seeding densities. H and I. Relating 3D cell densities to 2D cell densities. J. 2D cell speed measured at a time lag of 2 min at different cell numbers that relate to the 3D cell densities. K. Rate of proliferation remains unchanged with increasing cell density. In all panels, data was obtained from 3 independent experiments and is represented as mean  $\pm$  s.e.m. \*P<0.05; \*\*P<0.01; \*\*\*P<0.001(ANOVA)

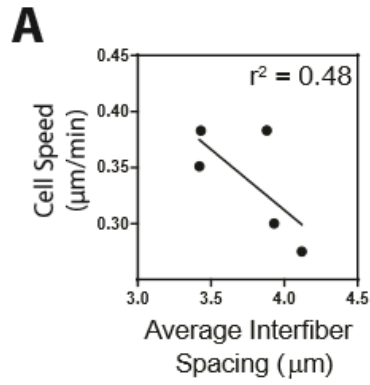

**Supplementary Figure 2: Physical cues that influence cell speed A.** Correlation plot of cell speed vs. average interfiber spacing. Data was obtained from 3 independent experiments and is represented as mean.

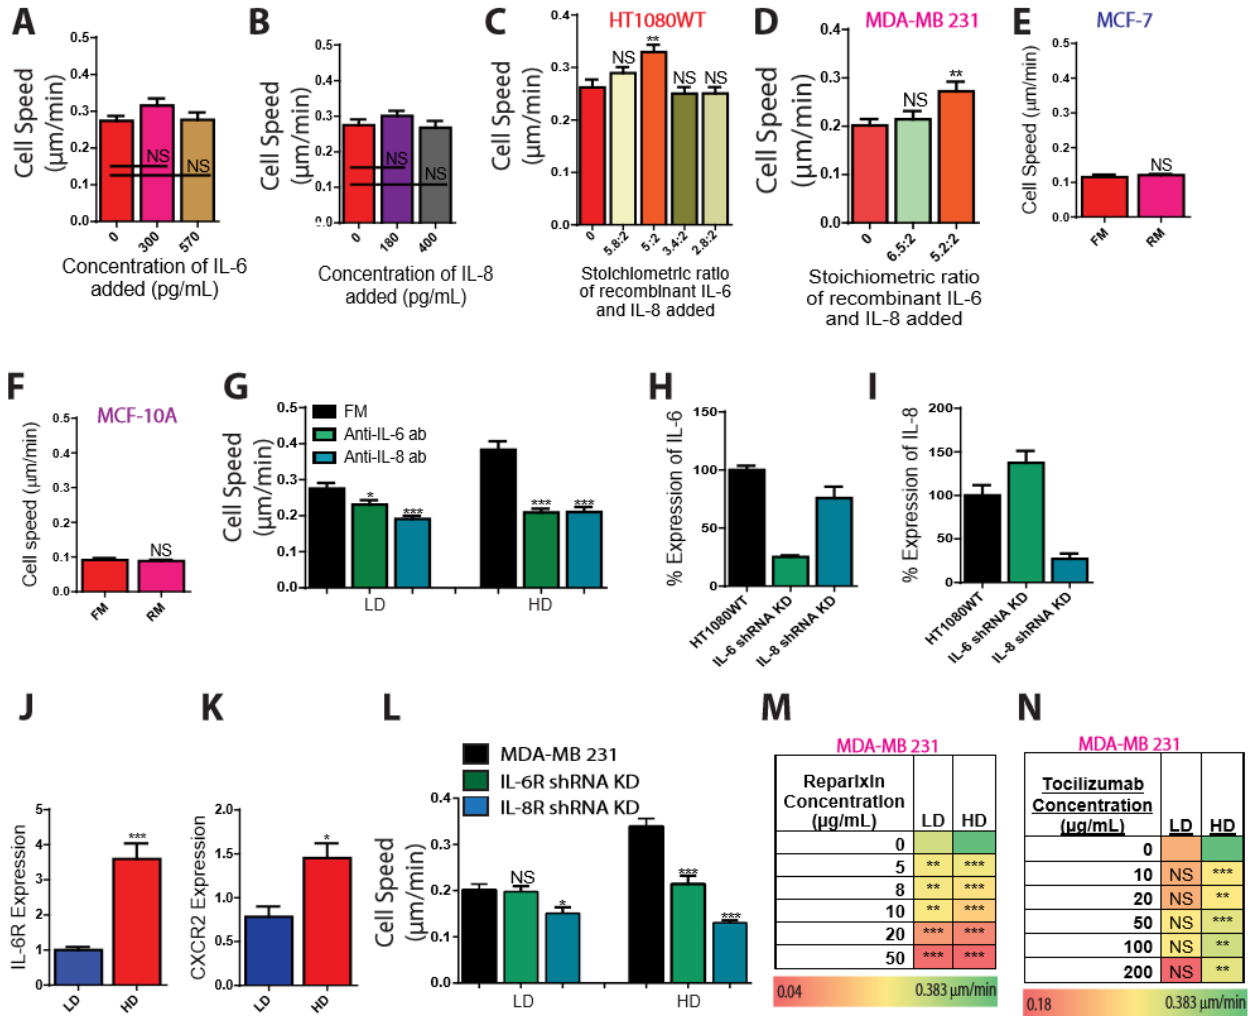

### Supplementary Figure 3: Biochemical cues that regulate cell density-dependent migration.

**A** and **B**. The addition of high concentrations of recombinant IL-6 alone or recombinant IL-8 alone do not increase cell speed. **C** and **D**. The addition of recombinant IL-6 and IL-8 in combination at ratios other than 5:2 does not induce the high speed observed at high densities. **E** and **F**. The addition of recombinant IL-6 and IL-8 in combination does not enhance migration in non-metastatic cells. **G**. Decreased velocity of cells exposed to specific IL-6 and IL-8 functional antibodies at LD ( $\rho = 10$ ) and HD ( $\rho = 50$ ) compared to untreated control cells. **H** and **I**. Decreased expression of IL-6 and IL-8 in shRNA mediated knockdowns. **J** and **K**. Expression of IL-6R and CXCR2 (IL-8R) as quantified by PCR. **L**. Decreased speed of the IL-6R and IL-8R knockdown cells at LD ( $\rho = 10$ ) and HD ( $\rho = 50$ ). **M** and **N**. Individually, Tocilizumab and Reparixin decreased cell speed of human carcinoma cells embedded in a 3D matrix at LD ( $\rho = 10$ ) and HD ( $\rho = 50$ ) compared to cells exposed to fresh medium (0). In all panels, data was

obtained from 3 independent experiments and is represented as mean  $\pm$  s.e.m. \*P<0.05;  
\*\*P<0.01; \*\*\*P<0.001(ANOVA)

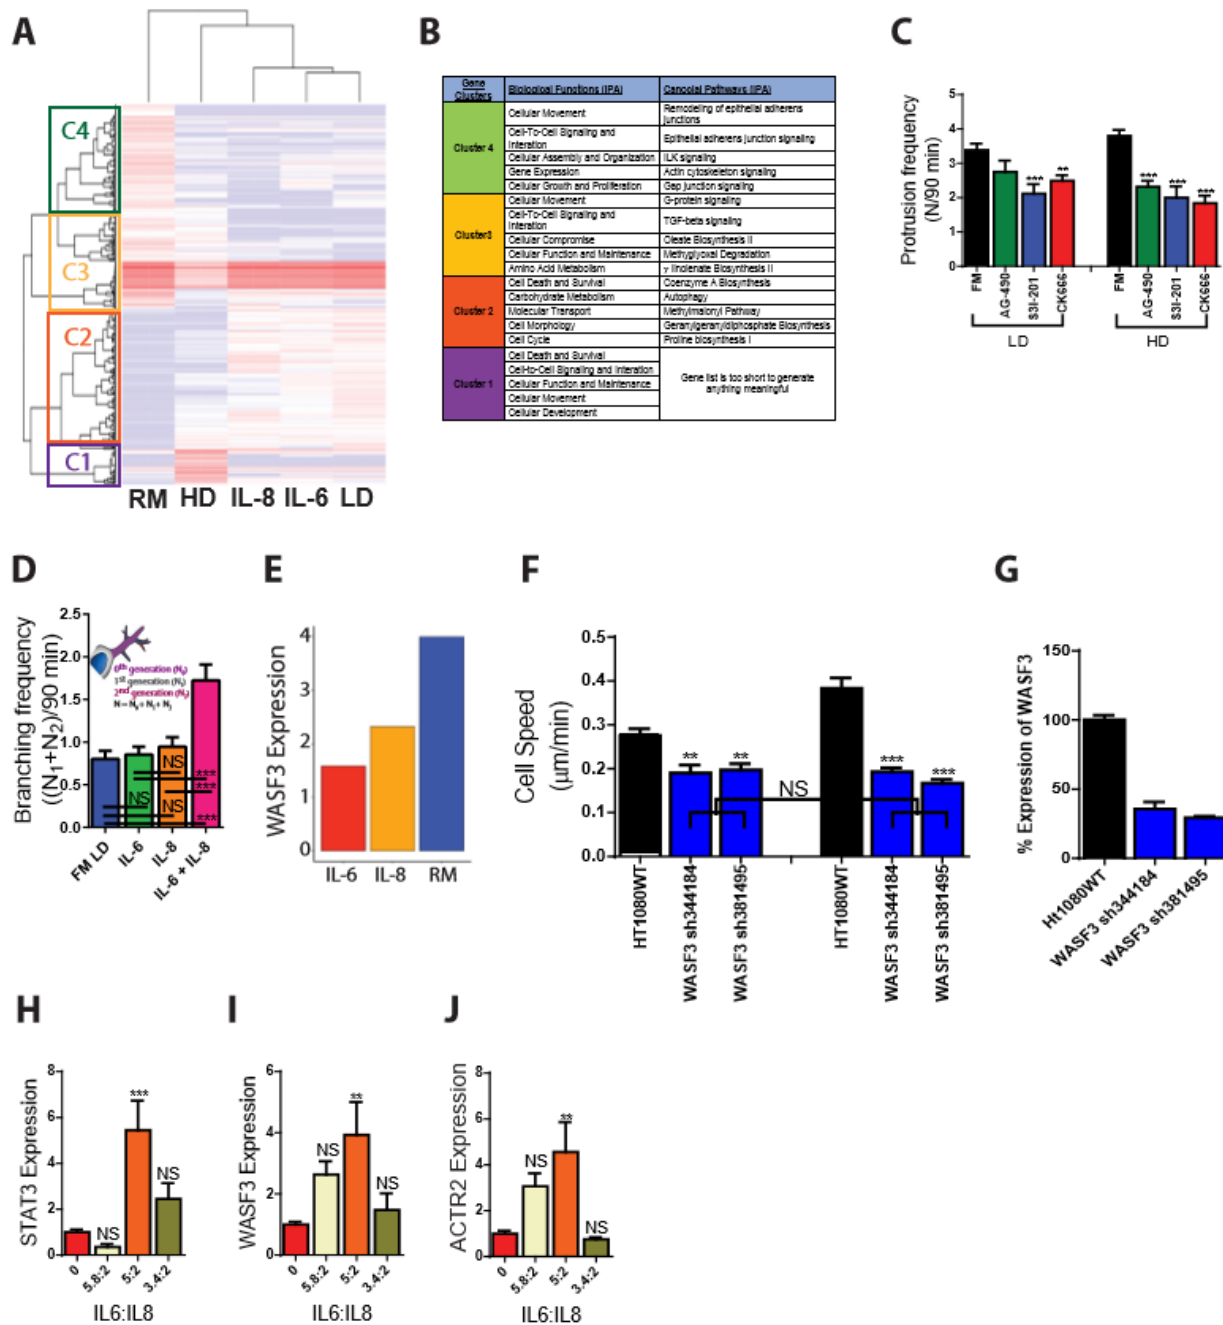

**Supplementary Figure 4: Proposed mechanism.** **A.** Heat map demonstrating the difference between gene ontology categories. **B.** Table demonstrating gene ontology categories. **C.** Decreased protrusion activity of human fibrosarcoma cells embedded in a 3D matrix exposed to JAK2 inhibitor, AG-490, STAT3 inhibitor, S3I-201, and Arp2/3 complex inhibitor, CK 666, at LD ( $p = 10$ ) and HD ( $p = 50$ ) compared to cells exposed to fresh medium (FM). **D.** The addition of recombinant IL-6 and IL-8 alone does not increase branching frequency, however the

addition of recombinant IL-6 and IL-8 in combination at the precise concentrations found in a matrix containing a high density of 50 cells/mm<sup>3</sup> (RM) significantly increases branching frequency. **E.** Increased expression of WASF3 in cells exposed to recombinant IL-6 and IL-8 in combination at the precise concentrations found in a matrix containing a high density of 50 cells/mm<sup>3</sup>. **F.** Decreased velocity of cells depleted of WASF3 at LD ( $\rho = 10$ ) and HD ( $\rho = 50$ ) compared to wildtype cells. **G.** Decreased mRNA expression of WASF3 in shRNA mediated knockdowns in HT1080 fibrosacroma. **H-J.** Maximal expression of STAT3, JAK2, and ACTR2 were observed when recombinant IL-6 and IL-8 were added in combination at a ratio of 5:2. In panels C,D, F-J, data was obtained from 3 independent experiments and is represented as mean  $\pm$  s.e.m. \*P<0.05; \*\*P<0.01; \*\*\*P<0.001(ANOVA). RNA Seq data (A,E) was obtained from a single experiment

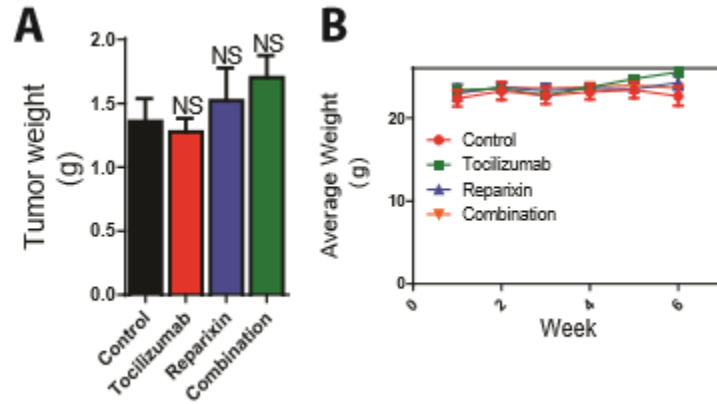

**Supplementary Figure 5: Validation in mouse xenograft model.** **A.** final tumor weight measured in grams. **B.** Average weight of mice measured in grams. In all panels, data was obtained from 5 individual mice in each set and is represented as mean  $\pm$  s.e.m. \*P<0.05; \*\*P<0.01; \*\*\*P<0.001(ANOVA)

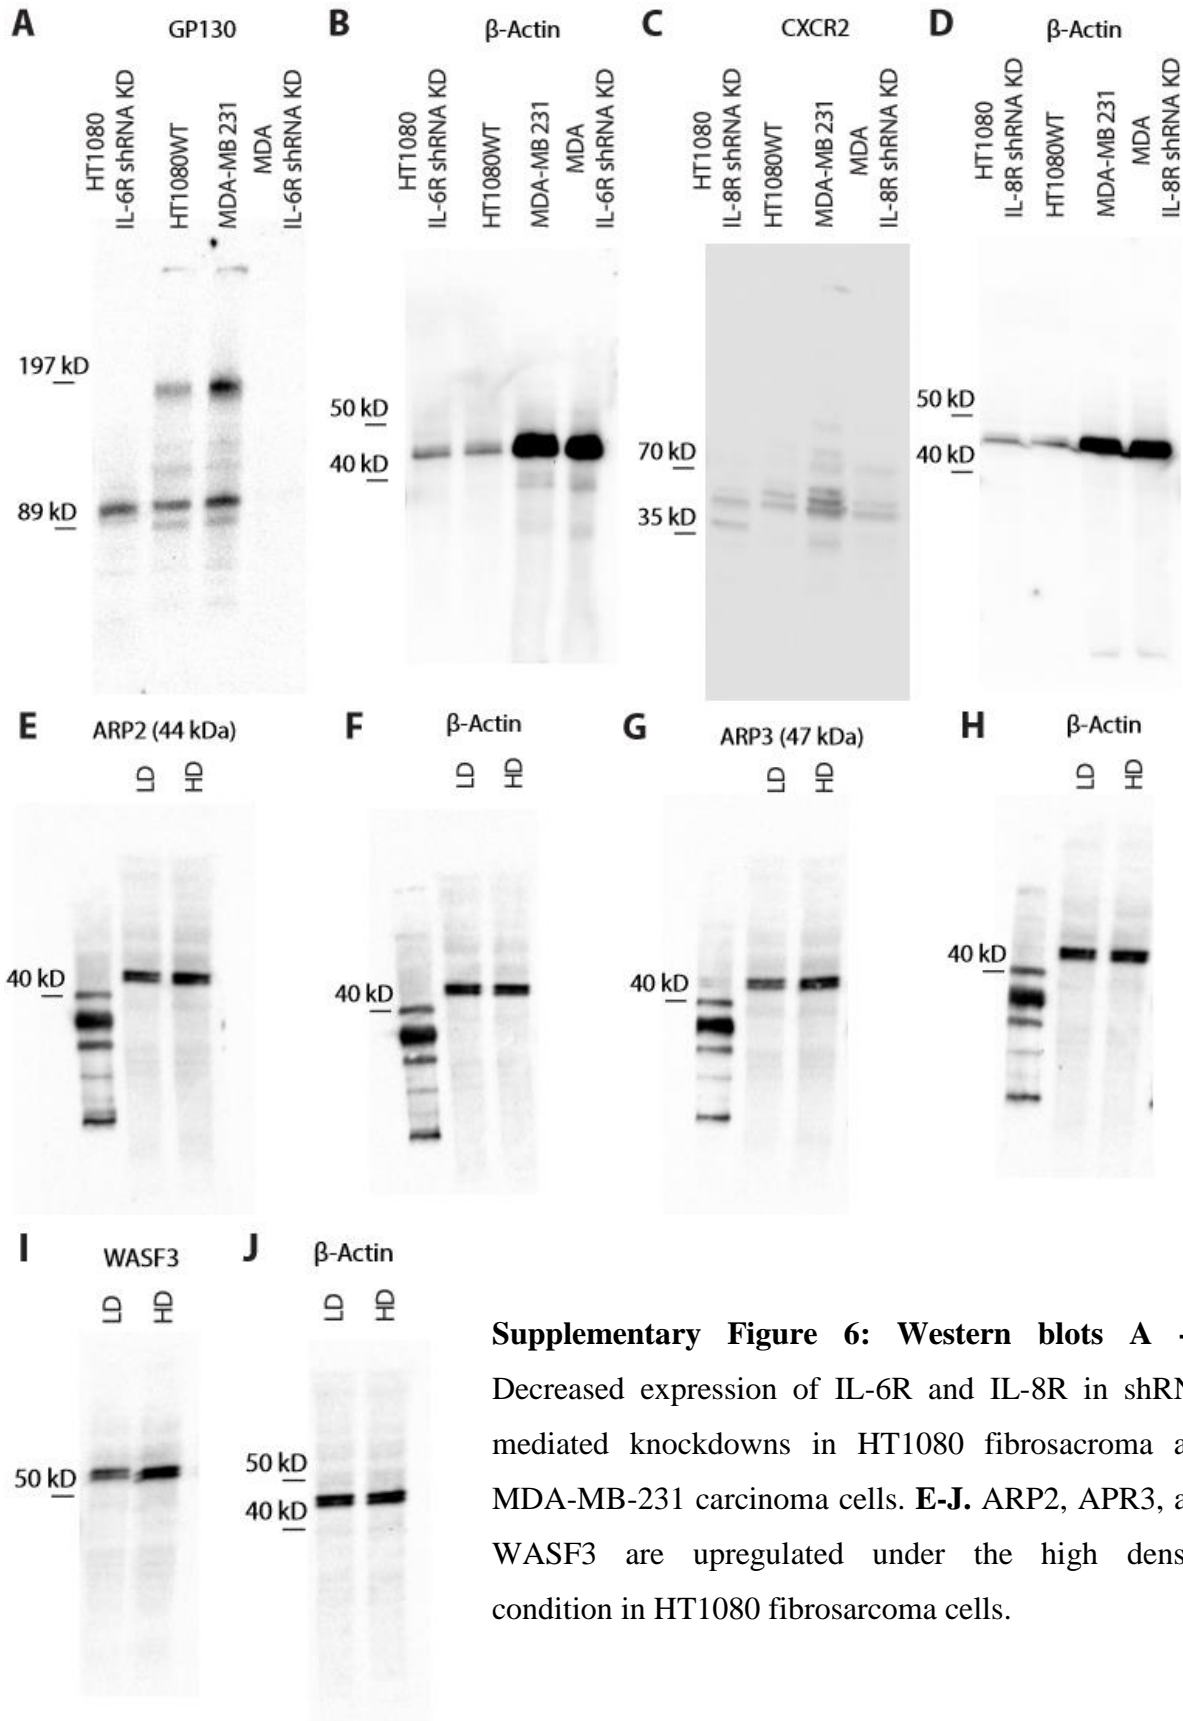

**Supplementary Figure 6: Western blots A -D.** Decreased expression of IL-6R and IL-8R in shRNA mediated knockdowns in HT1080 fibrosarcoma and MDA-MB-231 carcinoma cells. **E-J.** ARP2, APR3, and WASF3 are upregulated under the high density condition in HT1080 fibrosarcoma cells.



|                                 |                                                                 |
|---------------------------------|-----------------------------------------------------------------|
| <i>IL-6</i><br><i>sh59205</i>   | CCGGCATCTCATTCTGCGCAGCTTTCTCGAGAAAGCTGCGCAGAATGAGATGTTTTTG;     |
| <i>IL-8</i><br><i>sh232053</i>  | CCGGTGCGCCAACACAGAAATTATTCTCGAGAATAATTTCTGTGTTGGCGCATTTTTG;     |
| <i>IL-6R</i><br><i>sh289773</i> | CCGGCCAGTCCAGATATTTACATTCTCGAGAATGTGAAATATCTGGACTGG;            |
| <i>IL-8R</i><br><i>sh378365</i> | CCGGGAAGCGCTACTTGGTCAAATTCTCGAGAATTTGACCAAGTAGCGCTTCTT;         |
| <i>WASF3</i><br><i>sh344184</i> | CCGGCGCTGCTATTCGAATGGGAATCTCGAGATTCCCATTTCGAATAGCAGCGTTTTTG;    |
| <i>WASF3</i><br><i>sh381495</i> | GTACCGGGCATCGGACGTTACGGATTACCTCGAGGTAATCCGTAACGTCCGATGCTTTTTTG; |

**Supplementary Table 1:** Sequences for shRNA induced knockdown

|              |                          |
|--------------|--------------------------|
| HS-18S-FOR   | GAGGATGAGGTGGAACGTGT     |
| HS-18S-REV   | AGAAGTGACGCAGCCCTCTA     |
| HS-WASF3-FOR | AAGGGATTACCAGCGAACTTG    |
| HS-WASF3-REV | CTTCAGCATGTTTGCTCAGACT   |
| HS-ACTR2-FOR | CACCTGTGGGACTACACATTTG   |
| HS-ACTR2-REV | TGGTTGGGTTTCATAGGAGGTTTC |
| HK2 FWD      | CCAGTTCATTCACATCATCAG    |
| HK2 RVS      | CTTACACGAGGTCACATAGC     |

**Supplementary Table 2:** cDNA primers for QPCR
